1                   **Schistosomes alter expression of immunomodulatory gene products following**  
2                                           ***in vivo* praziquantel exposure**

3  
4                                           Paul McCusker<sup>1</sup>, Claudia M. Rohr<sup>1</sup> and John D. Chan<sup>1\*</sup>

5  
6           <sup>1</sup>Department of Cell Biology, Neurobiology & Anatomy, Medical College of Wisconsin, Milwaukee, WI  
7                                           53226, USA

8  
9   **\*Correspondence:**   John D. Chan  
10                                           Department of Cell Biology, Neurobiology & Anatomy (CBNA),  
11                                           8701 Watertown Plank Rd., Milwaukee, WI 53226  
12                                           e-mail: jdchan@mcw.edu

13  
14   **Declarations of interest:** none

15  
16   5 Figures, 1 Supplemental Figure, 1 Supplemental Table, 4 Supplemental Files

17  
18   **Short Title:** Transcriptional response of *Schistosoma mansoni* to *in vivo* praziquantel exposure

19 **Abstract**

20 Control of the neglected tropical disease schistosomiasis relies almost entirely on praziquantel (PZQ)  
21 monotherapy. How PZQ clears parasite infections remains poorly understood. Many studies have  
22 examined the effects of PZQ on worms cultured *in vitro*, observing outcomes such as muscle  
23 contraction. However, conditions worms are exposed to *in vivo* may vary considerably from *in vitro*  
24 experiments given the short half-life of PZQ and the importance of host immune system engagement for  
25 drug efficacy in animal models. Here, we investigated the effects of *in vivo* PZQ exposure on  
26 *Schistosoma mansoni*. Measurement of pro-apoptotic caspase activation revealed that worm death  
27 occurs only after parasites shift from the mesenteric vasculature to the liver, peaking 24 hours after  
28 drug treatment. This indicates that PZQ is not directly schistocidal, since the drug's half-life is ~2 hours,  
29 and focuses attention on parasite interactions with the host immune system following the shift of  
30 worms to the liver. RNA-Seq of worms harvested from mouse livers following sub-lethal PZQ treatment  
31 revealed drug-evoked changes in the expression of putative immunomodulatory and anticoagulant gene  
32 products. Several of these gene products localized to the schistosome esophagus and may be secreted  
33 into the host circulation. These include several Kunitz-type protease inhibitors, which are also found in  
34 the secretomes of other blood feeding animals. These transcriptional changes may reflect mechanisms  
35 of parasite immune-evasion in response to chemotherapy, given the role of complement-mediated  
36 attack and the host innate / humoral immune response in parasite elimination. One of these isoforms,  
37 SmKI-1, has been shown to exhibit immunomodulatory and anti-coagulant properties. These data  
38 provide insight into the effect of *in vivo* PZQ exposure on *S. mansoni*, and the transcriptional response of  
39 parasites to the stress of chemotherapy.

40

41 **Author Summary**

42 The disease schistosomiasis is caused by parasitic worms that live within the circulatory system. While  
43 this disease infects over 200 million people worldwide, treatment relies almost entirely on one drug,  
44 praziquantel, whose mechanism is poorly understood. In this study, we analyzed the effects of  
45 praziquantel treatment on the gene expression of parasites harvested from mice treated with  
46 praziquantel chemotherapy. Despite the rapid action of the drug on worms *in vitro*, we found that key  
47 outcomes *in vivo* (measurement of cell death and changes in gene expression) occurred relatively late  
48 (12+ hours after drug administration). We found that worms increased the expression of  
49 immunomodulatory gene products in response to praziquantel, including a Kunitz-type protease  
50 inhibitor that localized to the worm esophagus and may be secreted to the external host environment.  
51 These are an intriguing class of proteins, because they display anti-coagulant and immunomodulatory  
52 properties. Up-regulation of these gene products may reflect a parasite mechanism of immune-evasion  
53 in response to chemotherapy. This research provides insight into the mechanism of praziquantel by  
54 observing the effect of this drug on worms within the context of the host immune system.

55

56

57 **Introduction**

58           The neglected tropical disease schistosomiasis is caused by infection with parasitic *Schistosoma*  
59 blood-flukes and afflicts over 200 million people worldwide. These parasites can survive for years – even  
60 decades – within the host circulatory system, employing various mechanisms including mimicry of host  
61 glycans [1], binding non-immune immunoglobulins [2], and secretion of immunomodulatory  
62 extracellular vesicles [3]. With no vaccine available, control of this disease is almost entirely reliant upon  
63 chemotherapy with one drug – praziquantel (PZQ)[4].

64

65           PZQ's anti-parasitic mechanism of action remains poorly understood. Since the initial studies on  
66 this drug over four decades ago, it has been clear that a hallmark of PZQ action on worms is rapid, Ca<sup>2+</sup>-  
67 dependent contractile paralysis [5], with several Ca<sup>2+</sup> channels having been proposed as the drug's  
68 target(s) [6, 7]. However, while parasite contraction provides a clear visual readout of drug action *in*  
69 *vitro*, the mechanism of PZQ-evoked parasite elimination *in vivo* is more complex. For example, PZQ  
70 causes contractile paralysis of both immature and sexually mature worms *in vitro*, despite the fact that  
71 only sexually mature worms and not the immature liver-stage parasites are susceptible to PZQ  
72 treatment *in vivo* (Xiao et al., 1985). Whether PZQ-evoked contraction is related to tegument damage,  
73 the other signature effect of anthelmintic exposure, is also unclear. Muscle contraction occurs within  
74 seconds, but tegument depolarization occurs over a period of several minutes [8], and pharmacological  
75 experiments do not show a correlation between these two phenotypes [9]. Therefore, the *in vitro*  
76 phenotype of worm contraction, while useful for drug screening, provides an incomplete readout of  
77 PZQ's mechanism of action, which likely encompasses a cascade of events that trigger immune-  
78 mediated elimination of the parasites *in vivo*.

79

80 PZQ efficacy *in vivo* requires engagement of the host immune system. Following PZQ exposure,  
81 sexually mature worms display damage to the tegument surface, which exposes parasite antigens to the  
82 host humoral immune system [10] and triggers the recruitment of innate immune cells likely involved in  
83 parasite elimination [11]. PZQ is less efficacious at clearing infections from immunocompromised  
84 models such as T-cell [12] and B-cell deprived mice [13]. A requirement for the host immune system may  
85 also contribute to PZQ's lack of efficacy against immature parasites, since only after worms become  
86 sexually mature and begin egg laying does the host respond with a wave of macrophage recruitment to  
87 the liver and an acute Th2 response [14, 15]. Notably, PZQ is ineffective against unisex female infections,  
88 which do not reach sexual maturity and do not lay eggs [16].

89  
90 Given the importance of the host immune system to PZQ action, we sought to characterize  
91 *Schistosoma mansoni* transcriptional changes following *in vivo* drug exposure. Prior microarray  
92 experiments based on expressed sequence tag (EST) libraries have investigated changes in gene  
93 expression following *in vitro* PZQ treatment of *S. mansoni* [17] or *in vivo* PZQ treatment of *Schistosoma*  
94 *japonicum* [18]. But no comprehensive study of genome-wide changes in gene expression following *in*  
95 *vivo* PZQ treatment has been performed in the decade since these parasites' genomes have been  
96 sequenced. We established conditions for PZQ dosing that elicited a sublethal response in parasites *in*  
97 *vivo*, sequenced the transcriptomes of both sexually mature (7-week-old) and immature (4-week-old)  
98 infections treated with either vehicle control or PZQ, and then mapped the expression patterns of  
99 differentially expressed transcripts by *in situ* hybridization. These data revealed that numerous up-  
100 regulated transcripts were expressed near the esophagus – a location previously identified as a hotspot  
101 for expression of immunomodulatory gene products. Specifically, these data highlight a clade of up-  
102 regulated Kunitz-type protease inhibitors. Given the immunomodulatory and anti-coagulant activity

103 reported for one of these isoforms, SmKI-1 [19], these changes may reflect the response of parasites to  
104 the hostile, immune cell-rich environment of the liver following PZQ treatment.

105

## 106 **Materials and Methods**

107 Ethics statement. Animal work was carried out with the oversight and approval of the Laboratory Animal  
108 Resources facility at the Medical College of Wisconsin, adhering to the humane standards for the health  
109 and welfare of animals used for biomedical purposes defined by the Animal Welfare Act and the Health  
110 Research Extension Act. Experiments were approved by the Medical College of Wisconsin IACUC  
111 committee (approved protocol numbers AUA00006471 and AUA00006735).

112

113 *In vitro* schistosome assays. Female Swiss Webster mice infected with *S. mansoni* cercariae (NMRI strain)  
114 were sacrificed by CO<sub>2</sub> euthanasia at 4 weeks (for immature worms) or at 7 weeks post-infection (for  
115 mature worms). Immature worms were recovered from mouse livers, and mature worms were  
116 recovered from the mesenteric vasculature. Harvested worms were washed in DMEM (ThermoFisher  
117 cat. # 11995123) supplemented with HEPES (25mM), 5% v/v heat inactivated FCS (Sigma Aldrich cat. #  
118 12133C) and Penicillin-Streptomycin (100 units/mL). Worms were cultured in 6 well dishes (4-5 mature  
119 male worms or 8-10 immature worms in 3mL media per well) at varying concentrations of praziquantel  
120 (PZQ, Sigma-Aldrich cat. # P4668) or DMSO vehicle control and imaged to record phenotypes.

121

122 Cell proliferation assay. Immature and mature worms (harvested 25 and 49 days post-infection) were  
123 treated with drug (37°C, 14 hours). Worms were washed in drug-free media and allowed to recover for 8  
124 hours, before media was then supplemented with EdU (ThermoFisher Scientific cat. # C10637, 10µM)  
125 for a further 14 hours. Worms were fixed in 4% PFA in PBST (PBS + 0.3% triton X-100), washed in PBST,  
126 followed by 1:1 PBST:MeOH, and stored in 100% MeOH at -20°C. Worms were rehydrated in 1:1

127 PBST:MeOH, bleached (5% formamide, 0.5X SSC and 1.2% hydrogen peroxide in ddH<sub>2</sub>O), rinsed in PBST  
128 and permeabilized (0.1% SDS and 0.01mg/ml proteinase K in PBST) for either 30 min (7-week-old  
129 schistosomes) or 15 min (4-week-old schistosomes), post-fixed (4% PFA, 10 min), and EdU detection was  
130 performed using 1mM CuSO<sub>4</sub>, 0.1mM Azide-fluor 488 (ThermoFisher Scientific cat. # 760765) and  
131 100mM ascorbic acid in PBS. Worms were stained with DAPI (1μg/ml) and loaded into a 96 well optical  
132 bottom black plate for imaging using the ImageXpress Micro Confocal system (Molecular Devices).

133

134 *In vivo* hepatic shift assay. Mice harboring mature infections (6-7 weeks) were administered a fully  
135 curative single dose of PZQ (400 mg/kg PZQ dissolved in vegetable oil and delivered by oral gavage) or a  
136 sub-curative dose of PZQ (100 mg/kg PZQ solubilized in 50 μL DMSO, then diluted in 200 μL 5% w/v  
137 Trappsol (Cyclodextrin Technologies Development cat. # THPB-p-31g) in saline (NaCl 0.9%) solution and  
138 delivered by intraperitoneal injection). Mice were sacrificed by CO<sub>2</sub> euthanasia at varying timepoints  
139 after drug administration and worms were recovered from either the mesenteries, portal vein or liver.

140 Data = mean ± standard error for 3-5 mice per cohort.

141

142 Measurement of caspase 3/7 activation. Pro-apoptotic caspase 3/7 activation was measured in worms  
143 harvested from mice following drug treatment using the Caspase-Glo 3/7 Assay Kit (Promega). Worms  
144 were harvested from either the mesenteries or liver of mice, then homogenized in assay buffer (PBST,  
145 supplemented with HEPES 10mM and protease inhibitor (Roche cOmplete Mini EDTA-free Protease  
146 Inhibitor Cocktail)) using a mini mortar and pestle and stored at -80°C. Worm homogenate (5 pooled  
147 male and female worm pairs / 125μL assay buffer) was diluted 1:5 in distilled water and added to  
148 Caspase-Glo 3/7 substrate (1:1 volume ratio) in solid white 96 well plates. Luminescence was read using  
149 a SpectraMax i3x Multi-Mode Microplate Reader (Molecular Devices). Data reflect mean ± standard  
150 error of ≥ 3 biological replicates.

151  
152 Transmission electron microscopy. Worms were harvested from infected mice and treated with PZQ as  
153 described for movement assays, then fixed overnight at 4°C in 2.5% glutaraldehyde / 2%  
154 paraformaldehyde in 0.1M sodium cacodylate (pH 7.3). Worms were then washed in 0.1M sodium  
155 cacodylate (3x10 minutes) and post-fixed on ice (2 hours) in reduced 1% osmium tetroxide. Worms were  
156 washed in distilled water (2x10 minutes), stained in alcoholic uranyl acetate (overnight, 4°C), rinsed in  
157 distilled water, dehydrated in MeOH (50%, 75% and 95%), followed by successive rinses (10 minutes) in  
158 100% MeOH and acetonitrile. Worms were incubated in a 1:1 mixture of acetonitrile and epoxy resin for  
159 1 hour prior to 2x1-hour incubations in epoxy resin, then cut transversely and embedded overnight in  
160 epoxy resin (60°C). Ultra-thin sections (70nm) were cut onto bare 200-mesh copper grids, stained in  
161 aqueous lead citrate (1 minute), then imaged on a Hitachi H-600 electron microscope fitted with a  
162 Hamamatsu C4742-95 digital camera operating at an accelerating voltage of 75 kV.

163  
164 Comparative RNA-Seq. For experiments in Figure 1, mice were treated with a single, curative dose of  
165 PZQ (400 mg/kg) delivered by oral gavage, sacrificed by CO<sub>2</sub> euthanasia at various time-points, and  
166 worms were harvested from either the mesenteries or liver and homogenized in Trizol Reagent  
167 (Invitrogen). For experiments on mice treated with a sub-lethal dose of PZQ (100 mg/kg by  
168 intraperitoneal injection) at 4-weeks or 7-weeks post-infection, animals were sacrificed 14 hours later  
169 and worms were harvested. For 4-week-old infections, worms were harvested from the livers of vehicle  
170 control and PZQ treated mice. For 7-week-old infections, worms were harvested from either the  
171 mesenteric vasculature (vehicle control cohort) or the liver (PZQ treated cohort). Parasites were  
172 homogenized in Trizol, and libraries were generated using the TruSeq Stranded mRNA kit (Illumina),  
173 sequenced using the Illumina HiSeq 2500 system (high-output mode, 50 bp paired-end reads at 20  
174 million reads per sample), and trimmed reads were mapped to the *Schistosoma mansoni* genome (v7.2)



175 using HISAT2. Differentially expressed gene products between vehicle control and PZQ-treated samples  
176 were identified using EdgeR (tagwise dispersion model, FDR adjusted p-value < 0.05). Differentially  
177 expressed, up and down-regulated transcripts were ranked by fold change and then functional  
178 enrichment analysis was performed using g:Profiler [20] to identify enriched GO-terms and KEGG  
179 pathways. Read counts and differential expression data are contained in S1-S3 Files. FASTQ files  
180 containing RNA-Seq data have been deposited in the NCBI SRA database under accession numbers  
181 PRJNA597909 and PRJNA602528.

182  
183 Molecular cloning. RNA was recovered from control worms, or those treated with sublethal dose of PZQ  
184 (100mg/kg), using the Purelink RNA Mini kit (ThermoFisher Scientific), with on-column DNase treatment.  
185 cDNA was synthesized using the High-Capacity RNA to cDNA kit (ThermoFisher Scientific). Transcripts  
186 were amplified using FastStart Taq DNA Polymerase Kit (Millipore Sigma) using primers (S4 File).  
187 Amplicons were ligated into pGEM T-easy vector (Promega) and Sanger sequenced.

188  
189 *In situ* hybridization. Forward (control) and reverse (target) RNA probes were synthesized from plasmids  
190 amplified via PCR (Advantage HD Polymerase Kit, Takara Bio) using T7 or SP6 RNA Polymerases  
191 (ThermoFisher Scientific) along with DIG-UTP-labelling mix (Millipore Sigma). Worms harvested from the  
192 mesenteries of untreated mice were used to visualize transcripts Smp\_076320, Smp\_195070,  
193 Smp\_200150, Smp\_246770, Smp\_302320, and Smp\_311670. Transcripts Smp\_008660, Smp\_214060 and  
194 Smp\_336990 were visualized in worms harvested from livers of mice treated with sublethal dose of PZQ  
195 (100mg/kg), due to low levels of expression in untreated worms. *In situ* was performed as per reference  
196 [21]. Recovered worms were relaxed in 0.25% tricane (2-3 mins), killed in 0.6M MgCl<sub>2</sub>, and fixed (4%  
197 PFA, overnight at 4°C). Worms were washed in PBST, 1:1 PBST:MeOH, and stored in 100% MeOH, -20°C.  
198 Worms were rehydrated in 1:1 PBST:MeOH, PBST, washed in 1X SSC (10 min), bleached (5% formamide,

199 0.5X SSC and 1.2% hydrogen peroxide in ddH<sub>2</sub>O), permeabilized (0.1% SDS and 0.01mg/ml proteinase K  
200 in PBST), post-fixed (4% PFA), wasjied in 1:1 PBST + prehybridization solution, and then incubated in  
201 prehybridization solution (2 hours, 52°C). Worms were treated with probes for ≥16 hours at 52°C,  
202 washed in dilutions of SSC (2x and 0.2x) and TNT prior to blocking (1-2 hours in blocking solution of 5%  
203 heat-inactivated horse serum (Millipore Sigma), 0.5% Western Blocking Regent (Millipore Sigma), and  
204 incubated overnight in anti-DIG-AP (1:2000, Millipore Sigma). Worms were washed (TNTx - 0.1 M Tris  
205 pH 7.5, 0.15 M NaCl, and 0.1% Tween-20) and incubated in exposure buffer (100mM Tris Base, 100mM  
206 NaCl, 50mM MgCl<sub>2</sub>, 0.1% tween, 4.5µl/ml NBT and 3.5µl/ml BCIP in 10% PVA), followed by washing in  
207 100% EtOH (20 minutes).

208

## 209 **Results**

### 210 **Schistosome death occurs after the PZQ-evoked shift from the mesenteries to the liver**

211 Following PZQ exposure, *S. mansoni* shift from the mesenteric vasculature, where mature  
212 worms normally reside, to the liver [22]. We harvested worms from the mesenteries and livers of mice  
213 at various time points after PZQ (400 mg/kg) treatment in order to assess the effects of *in vivo*  
214 chemotherapy on parasites (Figure 1A). Worms were processed for measurement of pro-apoptotic  
215 caspase 3/7 activation, a readout of worm death, and imaging by transmission electron microcopy, to  
216 visualize changes to tissue ultrastructure. Worms displayed activated caspase 3/7 activity beginning 3  
217 hours after PZQ exposure, and this signal reached a maximum at 24 hours after drug treatment. This  
218 readout of worm death occurred after the hepatic shift – which began minutes after PZQ administration  
219 and was complete within 6 hours (Figure 1B). In parallel to processing these samples, worms were  
220 harvested for RNA-Seq at timepoints shown in Figure 1B. A total of 1848 transcripts were evidenced by  
221 an average TPM >3 across the timepoints studied and displayed >1 log<sub>2</sub> fold change relative to the  
222 controls t=0 timepoint (S1 File). Hierarchical clustering of these data revealed that the timepoints

223 clustered into two groups, 0 – 9 hours and 12 – 96 hours (Figure 1C). The onset of the greatest  
224 transcriptional changes, at around 12 hours after PZQ treatment, corresponds to the period following  
225 the parasite hepatic shift.

226

227 While changes such as hepatic shift, caspase activation and gene expression took several hours,  
228 PZQ caused rapid changes to schistosome tissue ultrastructure. The parasite tegument sits a top layers  
229 of body wall muscle, which exhibit a ‘bunched’ appearance at the earliest timepoint measured after  
230 drug administration (15 minutes). However, this effect was not apparent at later timepoints. From 3  
231 hours onward the muscle and tegument displayed a loss of integrity with extensive vacuolization. By 24  
232 hours post drug exposure, the tegument was almost entirely missing in certain regions, exposing  
233 underlying layers of body wall muscle (Figure 1D). This time course is notable because PZQ has a  
234 relatively short half-life *in vivo*. In humans, PZQ’s half-life is approximately 2 hours (reviewed in [23]),  
235 and elimination is likely even more rapid in mice. This brief window corresponds to the changes in worm  
236 musculature observed within an hour after drug treatment, but not the window of corresponding to  
237 worm death and the most dramatic changes in gene expression. Therefore, these data focused our  
238 attention on the events that occur following the parasite hepatic shift, between 12-24 hours after drug  
239 exposure.

240

241 **Figure 1. Parasite death occurs following *in vivo* hepatic shift. (A)** A curative dose of PZQ (400 mg/kg)  
242 was administered to mice 7 weeks post-infection and worms were harvested at various time points from  
243 either the mesenteries (M) or the liver (L). **(B)** Time course of parasite hepatic shift (open symbols, left  
244 axis) and pro-apoptotic caspase-3/7 activation (solid symbols, right axis). **(C)** Changes in gene expression  
245 in worms harvested at various timepoints following PZQ treatment in B. Heatmap reflects minimum  
246 (blue) and maximum (red) z-score values for all transcripts showing >1 log<sub>2</sub> fold change and average  
247 TPM > 3 (see S1 File for raw data). **(D)** Transmission electron microscope (TEM) images of the dorsal  
248 male body wall showing the time course of PZQ-evoked tissue damage. T = tegument. M = muscle.

249

250 **Establishing sublethal conditions for *in vivo* PZQ treatment**

251 In order to identify an active dose of PZQ for RNA-Seq studies that did not lethally and  
252 irreversibly impact schistosomes, we administered various doses of PZQ to mice harboring 7-week-old  
253 infections. As expected, treatment with a fully curative dose of PZQ (400 mg/kg) caused an irreversible  
254 hepatic shift. However, mice treated with low dose PZQ (100 mg/kg) exhibited only a transient parasite  
255 hepatic shift (Figure 2A), with worms recovering and returning to the mesenteric vasculature within two  
256 days. The sublethal effect of PZQ (100 mg/kg) was verified by measurement of pro-apoptotic caspase  
257 activity. Worms harvested from the livers of mice treated with PZQ (400 mg/kg) 14 hours after drug  
258 treatment exhibit a  $71.0 \pm 3.6$ -fold increase in caspase activation. However, worms harvested from the  
259 livers of mice treated with a low dose of PZQ (100mg/kg) at the same timepoint exhibit only a  $5.0 \pm 0.8$ -  
260 fold increase in caspase activation relative to vehicle controls (Figure 2B). Therefore, low dose PZQ (100  
261 mg/kg) was used for subsequent transcriptomic studies given a sublethal activity on schistosomes.

262

263 **Figure 2. Transcriptional response of mature *S. mansoni* to a sublethal dose of praziquantel. (A)** Mice  
264 were administered PZQ 400 mg/kg or PZQ 100 mg/kg and then euthanized at various time points to  
265 count the proportion of parasites found either within the liver (grey stacked bars) or outside the liver  
266 (white stacked bars). **(B)** Measurement of pro-apoptotic caspase-3/7 activation in homogenate of  
267 worms harvested from the livers of mice one day after treatment with PZQ 100 mg/kg or 400 mg/kg. **(C)**  
268 Volcano plot of transcripts differentially expressed between worms harvested from mice treated with  
269 PZQ (100 mg/kg) or vehicle control. **(D)** Gene-ontology (GO) term enrichment of up-regulated ( $\uparrow$ ) and  
270 down-regulated ( $\downarrow$ ) lists of transcripts (dashed line,  $p=0.05$ ). **(E-F)** Examples of differentially expressed  
271 gene products containing GO-term annotations in (D). (E) PZQ down-regulated transcripts and (F) PZQ  
272 up-regulated transcripts. These data include gene products reported in prior studies (PZQ down-  
273 regulation of ABCB1-3 and tyrosinase isoforms, and PZQ up-regulation of ferritin and CaBP isoforms) as  
274 well as down-regulated tegument like allergens (TALs) and up-regulated peptidase inhibitors (Kunitz-  
275 type protease inhibitors). Symbols represent TPM (Transcripts Per Million) from parasites harvested  
276 from individual mice ( $n=5$  independent biological replicates) treated with vehicle control (open symbols)  
277 or PZQ (solid symbols). Bar = mean TPM value for each cohort.

278

## 279 **Transcriptional response of mature parasites to *in vivo* PZQ exposure**

280 Having established a sub-lethal dose of chemotherapy, we analyzed gene expression in 7-week-  
281 old parasites harvested from mice 14 hours after treatment with PZQ (100 mg/kg). Equal numbers of  
282 male and female worms were harvested from the livers of PZQ treated mice or from the mesenteries of

283 vehicle control treated animals and processed for Illumina sequencing. Reads were mapped to the *S.*  
284 *mansoni* genome (v7) and differential gene expression was assessed between control and PZQ treated  
285 samples (S2 File). Up and down-regulated gene products were filtered based on  $\geq 2$ -fold change, FDR  
286 adjusted p-value  $< 0.05$ , and mean expression level  $> 2$  TPM in PZQ treated samples for up-regulated  
287 transcripts and mean expression level  $> 2$  TPM in control samples for down-regulated transcripts. This  
288 revealed 201 transcripts down-regulated and 204 transcripts up-regulated with PZQ treatment (Figure  
289 2C, S2 File).

290 Broadly, these data confirmed differentially expressed transcripts reported in prior microarray  
291 studies (Figure 2D-F). For example, down-regulated gene products were enriched in gene ontology (GO)  
292 terms such as transmembrane transporter activity (ex. ABC transporter ABCB1-3, Smp\_089200, which  
293 decreases in *S. mansoni* following PZQ exposure [17, 24]) and monooxygenase activity (ex. tyrosinase  
294 isoforms required for egg production [25] that are down-regulated in *S. japonicum* following PZQ  
295 treatment [18]). Up-regulated transcripts include numerous calcium ion binding proteins, although with  
296 smaller predicted molecular weights ( $\sim 8$ -10 kDa) than would be expected for calmodulins. These include  
297 various 8 kDa  $\text{Ca}^{2+}$  binding proteins (CaBPs) such as Smp\_033000, Smp\_032990, and Smp\_335140 (the  
298 homolog of the PZQ up-regulated *S. japonicum* Contig10880 [18]). Ferritin isoforms (Smp\_311630 &  
299 Smp\_311640) were also up-regulated, as observed in [17, 24]). However, the most enriched GO term,  
300 'peptidase inhibitor', was associated with a set of Kunitz-type protease inhibitors (Smp\_337730,  
301 Smp\_311660, Smp\_311670, Smp\_307450, and Smp\_324820) not previously reported in other studies of  
302 PZQ response – perhaps because these gene models were recently added in the *S. mansoni* v7 genome.

303

304 These transcriptome data also reveal a caveat for utilizing GO term or pathway analysis to study  
305 schistosome datasets. These approaches rely on gene annotations mapped from better studied model  
306 organisms. However, schistosomes contain many gene products that are unique to flatworms, and

307 either lack annotated protein domains or encode unique proteins that utilize these domains in novel  
308 ways. We found that PZQ up and down-regulated gene products were frequently unannotated and  
309 more likely to lack GO term annotations, PFAM domains, or have a BLASTp hit in well-studied model  
310 organisms (S1 Figure). Many flatworm-specific gene products have not been studied and have unknown  
311 expression patterns and function. However, several gene families found within our differentially  
312 expressed transcripts have putative roles in parasite development or host-parasite interactions [26-31].  
313 Micro-exon gene (MEG) members are both up-regulated (Smp\_336990 (MEG-2.2) and Smp\_127990  
314 (MEG-13)) and downregulated (Smp\_163710 (MEG-6) and Smp\_243770 (MEG-29)). Numerous egg  
315 protein CP391S-like transcripts are up-regulated (Smp\_194130, Smp\_102020, Smp\_179970,  
316 Smp\_201330), as well as several orphan lymphocyte antigen 6 (Ly6) members (transcripts Smp\_105220  
317 (SmLy6B), Smp\_081900 (SmLy6C), Smp\_166340 (SmLy6F), and Smp\_345020 (SmLy6J)). Finally, parasite  
318 allergens were down-regulated with PZQ treatment, including venom allergen-like (VAL) transcripts  
319 (Smp\_124060 (SmVAL13) and Smp\_154290 (SmVAL27)) and flatworm-specific tegumental allergen-like  
320 (TAL) transcripts. These TAL gene products - Smp\_086480 (SmTAL2 or Sm21.7), Smp\_086530 (SmTAL3 or  
321 Sm20.8), Smp\_195090 (SmTAL5), and Smp\_169200 (SmTAL11) – contain dynein-light-chain domains that  
322 account for GO term enrichment related to microtubule-based processes and transport (Figure 2D).

323

#### 324 **Transcriptional response of immature schistosomes to *in vivo* PZQ exposure**

325 While PZQ cures infections at the sexually mature (7-week-old) parasite stage, the drug is  
326 ineffective *in vivo* against immature (4-week-old) infections (Figure 3A, [16]). However, *in vitro* PZQ  
327 treatment has similar effects on either 4-week or 7-week old parasites, causing contractile paralysis at  
328 approximately equal concentrations (Figure 3B, [32]). Instead, the major difference between these two  
329 developmental stages appears to be the effect of PZQ treatment on neoblast-like, mitotically active  
330 cells. Immature 4-week-old worms exposed to PZQ for 12 hours, followed by a pulse of EdU, show

331 retained mitotic activity - even after PZQ doses as high as 10  $\mu$ M. However, similarly treated mature 7-  
332 week old worms display at loss of mitotic activity following treatment with concentrations of PZQ  
333 ranging from 0.1 – 0.5  $\mu$ M (Figure 3C).

334

335 **Figure 3. Praziquantel-evoked transcriptional changes in immature schistosomes. (A)** Immature, 4-  
336 week-old parasites are unresponsive to PZQ treatment *in vivo*, while 7-week-old infections are cleared.  
337 However, **(B)** PZQ has comparable effects on the contraction of both immature and mature worms  
338 treated *in vitro*. Left = images of worms treated with varying concentrations of PZQ. Right =  
339 quantification of worm body length as a measure of contractile paralysis. **(C)** Effects of *in vitro* PZQ  
340 treatment (14 hours) on the mitotic activity of 4-week and 7-week-old worms (worms harvested from  
341 mice at 25 and 49 days post-infection, respectively, plus 2 days in culture). Green = EdU incorporation.  
342 Blue = DAPI counterstain. Scoring reflects number of EdU positive worms per treatment condition. **(D-E)**  
343 Venn diagram of down-regulated and up-regulated transcripts following PZQ treatment of 4-week-old  
344 and 7-week-old worms. Scatter plots reflect  $\log_{10}$  fold change of transcripts found in the intersection of  
345 both datasets relative to vehicle control. Orange = tegument like allergens (TALs). Red = Kunitz-type  
346 protease inhibitors (KI). Blue = Iron ion binding gene products.

347

348           Given these data, we were interested to see to what extent the transcriptional response of 4-  
349 week-old worms to *in vivo* PZQ exposure resembled that of 7-week-old worms. Mice were dosed with  
350 PZQ (100 mg/kg) or vehicle control 4 weeks post-infection, euthanized 14 hours later, and parasites  
351 were harvested from the livers for comparative RNA-Seq just as for 7-week old samples. There were less  
352 differentially regulated transcripts in 4-week-old worms relative to the 7-week dataset (69 PZQ down-  
353 regulated transcripts and 66 PZQ up-regulated transcripts, S3 File). Of the transcripts differentially  
354 expressed in immature worms with PZQ treatment, roughly half were found in the 7-week dataset. GO  
355 term enrichment in the 4-week-old worm dataset was broadly similar to the 7-week dataset (S1 Table).  
356 PZQ down-regulated gene products in each dataset included various TAL gene products (SmTAL2,  
357 SmTAL3 and SmTAL5, Figure 3D), and PZQ up-regulated gene products in both 4 and 7-week old worms  
358 included Kunitz-type protease inhibitors and ferritin isoforms (Figure 3E).

359

360 **Tissue localization of transcripts differentially expressed following PZQ exposure**

361 We performed *in situ* hybridization to localize the expression patterns of PZQ up and down-  
362 regulated gene products in adult, 7-week-old worms. Many down-regulated transcripts localized to the  
363 germ line (Figure 4A) – with expression patterns staining the female vitellaria (Smp\_076320 (myb/sant-  
364 like) and ovaries (Smp\_246770 (cadherin)), as well as the male testes (Smp\_195090 (SmTAL5)). This is  
365 consistent with PZQ treatment causing loss of mitotic activity in germ line tissues.

366

367 **Figure 4. Expression patterns of transcripts differentially regulated with praziquantel treatment.** *In situ*  
368 hybridization of transcripts **(A)** down-regulated and **(B)** up-regulated following *in vivo* PZQ treatment  
369 relative to vehicle controls. F = sense negative control probes. R = antisense probes. Images show, from  
370 top to bottom, anterior to posterior panels of worms. Ov = ovaries, T = testis, Vit = vitellaria, E =  
371 esophagus, S = oral sucker. Scale = 1mm.  
372

373 Many PZQ up-regulated transcripts, such as Kunitz-type protease inhibitors, heat-shock protein,  
374 MEG 2.2, alpha-crystallin and phosphoglycerate kinase displayed expression patterns with varied  
375 localization within the male body. However, these commonly displayed strong expression at the anterior  
376 of the worm, with staining glands located around the esophagus (Figure 4B). The schistosome  
377 esophagus has been shown to be a secretory organ [33], and various MEG and VAL gene products have  
378 been localized to this structure [27].

379

### 380 **Time course of PZQ-evoked changes in gene expression**

381 Given that our RNA-Seq was generated on worms harvested at a relatively late timepoint after  
382 drug exposure, we wanted to establish whether these data reflect acute, drug-evoked transcriptional  
383 changes or a response to later events such as the parasite hepatic shift. Therefore, we administered a  
384 single dose of PZQ (400 mg/kg) to mice harboring 7-week old infections and harvested parasites at  
385 various timepoints (from 15 minutes to 4 days) for analysis of gene expression. These data revealed that  
386 the observed changes in gene expression, such as up-regulation of Kunitz-type protease inhibitors and  
387 down-regulation of TALs, occurred relatively late after drug administration, rather than within the short



388 window during which PZQ reaches a  $C_{max}$  *in vivo* (Figure 5A). These timepoints correspond to the  
389 parasite hepatic shift (~12 hours onward), and may reflect the parasite response to the change in  
390 location within the host, as worms shift from the mesenteric vasculature to the Th2 environment of the  
391 granulomatous liver rich in macrophages and granulocytes (Figure 5B).

392

393 **Figure 5. PZQ-evoked changes in immunomodulatory gene products corresponds to the onset of the**  
394 **parasite hepatic shift. (A) Top** - Kinetics of parasite hepatic shift following PZQ (open symbols, data  
395 from Figure 1B) and predicted PZQ elimination (grey). *Bottom* - Expression (fold change) of various  
396 immunomodulatory gene products such as Kunitz-type protease inhibitors (increasing, red) and  
397 tegument-like allergens (decreasing, blue) in worms harvested at various points in the PZQ time-course  
398 shown in Figure 1. **(B) Model** for schistosome release of immunomodulatory signals in response to  
399 chemotherapy. Worms normally reside within the host circulatory system, evading detection by the  
400 innate and humoral immune system. The parasite tegument is damaged following PZQ exposure, and  
401 worms are exposed to the milieu of immune cells within the liver. Secreted signals may dampen the  
402 immune response, as well as impair coagulation and resulting activation of the complement pathway.  
403 Images created with BioRender.com.

404

## 405 Discussion

406 While PZQ has been the frontline anthelmintic used to control schistosomiasis for over 40 years, the  
407 drug's molecular mechanism of action is poorly understood. From *in vitro* studies it is clear that PZQ has  
408 pronounced effects on parasite musculature and tegument [5, 32]. However, we were interested in  
409 several apparent inconsistencies between *in vitro* and *in vivo* observations of PZQ activity. First, it is not  
410 clear that PZQ is directly schistocidal *in vivo*. That is, while *in vitro* experiments often measure worm  
411 death after periods of drug incubation, PZQ has a short half-life *in vivo* (~2 hours in humans, reviewed in  
412 [23]). Worms harvested from mice after treatment with PZQ indeed display rapid changes in muscle  
413 structure (within minutes of drug administration, Figure 1D). However, this effect was transient, and  
414 outcomes such as parasite tegument damage, broad transcriptional changes and death did not occur  
415 until hours later - reaching a maximum at one day after drug treatment. Second, PZQ does not cure  
416 immature 4-week-old infections [34, 35]. This is a clinically important feature of PZQ that may underpin  
417 treatment failure in areas of high transmission [36]. However, it is not entirely accurate to say that

418 immature worms are unresponsive to PZQ, since the drug causes contractile paralysis of both 4-week  
419 and 7-week-old parasites *in vitro* with approximately equal potency ([32], Figure 3B). Therefore, in order  
420 to better understand the effect of *in vivo* PZQ exposure on *S. mansoni*, we performed comparative RNA-  
421 Seq on mature and immature worms harvested from PZQ-treated mice. These data provide an overview  
422 of not just direct PZQ-evoked changes in gene expression (as may be the case with *in vitro* PZQ  
423 treatment [17]), but also the worm response to environmental change (i.e. shift from the mesenteric  
424 vasculature to the liver) and attack by components of the host immune system.

425

#### 426 **Comparative responses of immature and mature schistosomes to PZQ**

427 The transcriptional response to *in vivo* PZQ exposure is similar between 4-week-old and 7-week-  
428 old parasites (Figure 3, S1 Table) – although mature parasites show greater changes in gene expression,  
429 perhaps reflecting a greater sensitivity to chemotherapy. It has also been speculated that lack of *in vivo*  
430 PZQ efficacy against 4-week-old parasites may be due to PZQ pharmacokinetics, since mature worms  
431 within the mesenteric vasculature are exposed to higher drug concentrations prior to first pass  
432 metabolism [23, 37]. Another possibility is the difference in the host immune environment at the 4-  
433 week stage of infection relative to mature infections [38, 39]. Indeed, both these factors may contribute  
434 to a lack of PZQ efficacy against juvenile worms. However, the neoblast-like cells of immature and  
435 mature worms are affected differently following *in vitro* PZQ exposure (Figure 3C), indicating that there  
436 are inherent differences between these stages. Since immature worms harbor more abundant stem  
437 cells, such as transitory somatic  $\epsilon$ -cells [40], this may account for treatment failure during these  
438 developmental stages.

439

#### 440 **PZQ-evoked changes in immunomodulatory gene products**

441 Many of the gene products differentially regulated by PZQ modulate the host immune system.  
442 What might be the biological effect of PZQ regulation of immunomodulatory gene products? Various  
443 blood-dwelling parasitic helminths secrete immunomodulatory vesicles into the host circulation [3, 41,  
444 42], and under normal infection conditions schistosomes modulate components of the host circulatory  
445 system. For example, blood from mice harboring patent schistosome infections displays altered clotting  
446 properties relative to uninfected mice or mice with immature infections [43]. Parasites may up-regulate  
447 anti-clotting signals as an immune-evasion mechanism, since fibrin clots serve as a scaffold for adhesion  
448 of granulocytes and monocytes, and activated platelets regulate recruitment and actions of innate  
449 immune cells (reviewed in [44]). Schistosomes are susceptible to attack by the host complement system  
450 (reviewed in [45]), which is activated by enzymes in the coagulation cascade such as FXa. Therefore, up-  
451 regulation of anti-coagulant gene products may enable schistosomes to survive transient PZQ exposure  
452 *in vivo* and ultimately resume patent infections within the mesenteric vasculature.

453  
454 Many immunomodulatory gene products are expressed in the schistosome esophagus [33].  
455 These gene products are likely important internally, protecting the parasite from ingested immune  
456 components and enzymes found in leukocytes and erythrocytes [27, 46-49], and they may also be  
457 secreted outside of the worm to modulate various immune cells within the host circulation. PZQ up-  
458 regulation of esophageal immunomodulatory gene products may be a parasite response to evade  
459 recognition by the host immune system, triggered either by drug-evoked tegument damage or the  
460 hostile immune environment of the liver.

461  
462 For example, the most enriched group of up-regulated transcripts were Kunitz-type protease  
463 inhibitors. One of these, SmKI-1, has been characterized and shown to inhibit neutrophil function [19]  
464 and impair blood coagulation via inhibition of enzymes such as FXa [50]. *In situ* hybridization localized

465 PZQ up-regulated Kunitz-type protease inhibitors to the schistosome esophagus (Figure 4B). Blood-  
466 feeding animals harbor various Kunitz-type protease inhibitors with anti-coagulant activity [51] and  
467 these proteins are enriched in the salivary proteomes of these organisms [52, 53]. Kunitz-type protease  
468 inhibitors have also been found in the secretomes of other parasitic flatworms [54, 55], and shown to  
469 act as ion channel blockers [56] and inhibitors of dendritic cell activation [57]. Additionally, laboratory  
470 strains of *S. mansoni* selected for PZQ resistance show altered expression of a various Kunitz-type  
471 protease inhibitors, indicating these may be involved in drug resistance [58].

472

473           While secreted proteins may promote immune evasion in the short term, numerous gene  
474 products in our PZQ up-regulated dataset have also been proposed as schistosomiasis vaccine targets.  
475 This includes SmKI-1 [59, 60], but also cathepsins [61], MEGs [62] and tetraspanins [63]. Therefore,  
476 secreted signals may assist in evasion of the innate immune system while also promoting development  
477 of host antibodies against parasite antigens. This acquired immunity may not be deleterious to existing  
478 schistosomes, which are able to survive within the circulatory system alongside host antibodies and  
479 immune cells [64], but recognition of parasite antigens may confer immunity to new infections following  
480 chemotherapy [65-67].

481

482           These data are the first comparative RNA-Seq dataset on *S. mansoni* exposed to PZQ *in vivo*. Our  
483 findings confirm changes in gene expression reported in prior *in vitro* studies and microarray  
484 experiments, as well as revealing changes in the expression of immunomodulatory gene products that  
485 localize to the parasite esophageal glands. Given that several of these gene products, such as the Kunitz-  
486 type protease inhibitors, have anti-coagulant effects in both schistosomes and other blood feeding  
487 parasites and vectors, these changes may reflect a mechanism employed by schistosomes to actively  
488 subvert the hemostatic system and evade the host immune system in response to chemotherapy. These

489 mechanisms inform our basic understanding of parasite interaction with their hosts and provide insight  
490 into potential mechanisms for PZQ treatment failure or routes to anthelmintic drug resistance.

491

## 492 **Acknowledgements**

493 The following reagent was provided by the NIAID Schistosomiasis Resource Center for distribution  
494 through BEI Resources, NIH-NIAID Contract HHSN272201700014I. NIH: *Schistosoma mansoni*, Strain  
495 NMRI, Exposed Swiss Webster Mice, NR-21963.

496

## 497 **Supporting Information**

### 498 **S1 Figure. Parasite-specific gene products are differentially expressed in praziquantel treated worms.**

499 X-axis = Gene products evidenced by read mapping >0 ranked from most up-regulated to most down-  
500 regulated following PZQ treatment. Y-axis = number of transcripts that lack a GO term annotation (top),  
501 PFAM protein domain (middle) or BLASTp hit verses the landmark database (bottom) for every 100 gene  
502 products.

503

504 **S1 Table. GO-term enrichment in differentially expressed transcripts following PZQ treatment.** GO-  
505 term enrichment from list up up-regulated and down-regulated transcripts (at least two-fold change,  
506 FDR adjusted p value < 0.05) for both immature (4-week) and mature (7-week) infections. n.s. = not  
507 significant.

508

509 **S1 File. Time course RNA-Seq data following *in vivo* PZQ treatment. (Sheet 1)** Read counts or **(Sheet 2)**  
510 Transcripts Per Million (TPM) for transcripts in worms harvested from mice treated with PZQ  
511 (400mg/kg). **(Sheet 3)** Z-scores of 1848 transcripts with an average TPM >3 and >1 log<sub>2</sub> fold change  
512 relative to the t=0 timepoint that were used to generate the heat map in Figure 1C.

513

514 **S2 File. RNA-Seq data for 7-week worms following *in vivo* PZQ treatment. (Sheet 1)** Read counts or  
515 **(Sheet 2)** Transcripts Per Million (TPM) for transcripts in worms harvested from mice (n=5) treated with  
516 either vehicle control or PZQ (100mg/kg) 7-weeks post-infection. **(Sheet 3)** List of filtered PZQ up and  
517 down-regulated transcripts.

518

519 **S3 File. RNA-Seq data for 4-week worms following *in vivo* PZQ treatment. (Sheet 1)** Read counts or  
520 **(Sheet 2)** Transcripts Per Million (TPM) for transcripts in worms harvested from mice (n=5) treated with  
521 either vehicle control or PZQ (100mg/kg) 4-weeks post-infection. **(Sheet 3)** List of filtered PZQ up and  
522 down-regulated transcripts.

523

524 **S4 File. Primers used in generation of *in situ* hybridization probes.** Primer sequences for forward and  
525 reverse *in situ* hybridization probes used in Figure 4 .

526 **References**

- 527 1. van Die I, Cummings RD. Glycan gimmickry by parasitic helminths: a strategy for  
528 modulating the host immune response? *Glycobiology*. 2010;20(1):2-12. Epub 2009/09/15. doi:  
529 10.1093/glycob/cwp140. PubMed PMID: 19748975.
- 530 2. Wu C, Hou N, Piao X, Liu S, Cai P, Xiao Y, et al. Non-immune immunoglobulins shield  
531 *Schistosoma japonicum* from host immunorecognition. *Sci Rep*. 2015;5:13434. doi:  
532 10.1038/srep13434. PubMed PMID: 26299686; PubMed Central PMCID: PMC4547136.
- 533 3. Meningher T, Barsheshet Y, Ofir-Birin Y, Gold D, Brant B, Dekel E, et al. Schistosomal  
534 extracellular vesicle-enclosed miRNAs modulate host T helper cell differentiation. *EMBO Rep*.  
535 2019:e47882. Epub 2019/12/12. doi: 10.15252/embr.201947882. PubMed PMID: 31825165.
- 536 4. Colley DG, Bustinduy AL, Secor WE, King CH. Human schistosomiasis. *Lancet*.  
537 2014;383(9936):2253-64. Epub 2014/04/05. doi: 10.1016/S0140-6736(13)61949-2. PubMed  
538 PMID: 24698483; PubMed Central PMCID: PMC4672382.
- 539 5. Pax R, Bennett JL, Fetterer R. A benzodiazepine derivative and praziquantel: effects on  
540 musculature of *Schistosoma mansoni* and *Schistosoma japonicum*. *Archives Pharmacol*.  
541 1978;304:309-15.
- 542 6. Kohn AB, Anderson PAV, Roberts-Misterly JM, Greenberg RM. Schistosome calcium  
543 channel beta subunits. Unusual modulatory effects and potential role in the action of the  
544 antischistosomal drug praziquantel. *J Biol Chem*. 2001;40:36873-6.
- 545 7. Park SK, Gunaratne GS, Chulkov EG, Moehring F, McCusker P, Dosa PI, et al. The  
546 anthelmintic drug praziquantel activates a schistosome transient receptor potential channel. *J*  
547 *Biol Chem*. 2019;294(49):18873-80. Epub 2019/10/28. doi: 10.1074/jbc.AC119.011093. PubMed  
548 PMID: 31653697.
- 549 8. Bricker CS, Pax RA, Bennett JL. Microelectrode studies of the tegument and sub-  
550 tegumental compartments of male *Schistosoma mansoni*: anatomical location of sources of  
551 electrical potentials. *Parasitology*. 1982;85 (Pt 1):149-61. Epub 1982/08/01. PubMed PMID:  
552 7122122.
- 553 9. Bricker CS, Depenbusch JW, Bennett JL, Thompson DP. The Relationship between  
554 Tegumental Disruption and Muscle-Contraction in *Schistosoma mansoni* Exposed to Various  
555 Compounds. *Zeitschrift Fur Parasitenkunde-Parasitology Research*. 1983;69(1):61-71. PubMed  
556 PMID: ISI:A1983QC59200007.
- 557 10. Reimers N, Homann A, Hoschler B, Langhans K, Wilson RA, Pierrot C, et al. Drug-induced  
558 exposure of *Schistosoma mansoni* antigens SmCD59a and SmKK7. *PLoS Negl Trop Dis*.  
559 2015;9(3):e0003593. Epub 2015/03/17. doi: 10.1371/journal.pntd.0003593. PubMed PMID:  
560 25774883; PubMed Central PMCID: PMC4361651.

- 561 11. Panic G, Ruf MT, Keiser J. Immunohistochemical Investigations of Treatment with Ro 13-  
562 3978, Praziquantel, Oxamniquine, and Mefloquine in *Schistosoma mansoni*-Infected Mice.  
563 Antimicrob Agents Chemother. 2017;61(12). Epub 2017/10/04. doi: 10.1128/AAC.01142-17.  
564 PubMed PMID: 28971860; PubMed Central PMCID: PMC5700362.
- 565 12. Sabah AA, Fletcher C, Webbe G, Doenhoff MJ. *Schistosoma mansoni*: reduced efficacy of  
566 chemotherapy in infected T-cell-deprived mice. Exp Parasitol. 1985;60(3):348-54. Epub  
567 1985/12/01. doi: 10.1016/0014-4894(85)90041-4. PubMed PMID: 3935473.
- 568 13. Brindley PJ, Sher A. The chemotherapeutic effect of praziquantel against *Schistosoma*  
569 *mansoni* is dependent on host antibody response. J Immunol. 1987;139(1):215-20. PubMed  
570 PMID: 3108397.
- 571 14. Nascimento M, Huang SC, Smith A, Everts B, Lam W, Bassity E, et al. Ly6Chi monocyte  
572 recruitment is responsible for Th2 associated host-protective macrophage accumulation in liver  
573 inflammation due to schistosomiasis. PLoS pathogens. 2014;10(8):e1004282. Epub 2014/08/22.  
574 doi: 10.1371/journal.ppat.1004282. PubMed PMID: 25144366; PubMed Central PMCID:  
575 PMC4140849.
- 576 15. Barron L, Wynn TA. Macrophage activation governs schistosomiasis-induced  
577 inflammation and fibrosis. Eur J Immunol. 2011;41(9):2509-14. Epub 2011/09/29. doi:  
578 10.1002/eji.201141869. PubMed PMID: 21952807; PubMed Central PMCID: PMC3408543.
- 579 16. R. Gönner PA. Praziquantel, a new broad-spectrum antischistosomal agent. Z  
580 Parasitenkd. 1977;52(2):129-50.
- 581 17. Hines-Kay J, Cupit PM, Sanchez MC, Rosenberg GH, Hanelt B, Cunningham C.  
582 Transcriptional analysis of *Schistosoma mansoni* treated with praziquantel *in vitro*. Mol  
583 Biochem Parasitol. 2012. Epub 2012/10/02. doi: 10.1016/j.molbiopara.2012.09.006. PubMed  
584 PMID: 23022771.
- 585 18. You H, McManus DP, Hu W, Smout MJ, Brindley PJ, Gobert GN. Transcriptional  
586 responses of *in vivo* praziquantel exposure in schistosomes identifies a functional role for  
587 calcium signalling pathway member CamKII. PLoS pathogens. 2013;9(3):e1003254. Epub  
588 2013/04/05. doi: 10.1371/journal.ppat.1003254. PubMed PMID: 23555262; PubMed Central  
589 PMCID: PMC3610926.
- 590 19. Morais SB, Figueiredo BC, Assis NRG, Alvarenga DM, de Magalhaes MTQ, Ferreira RS, et  
591 al. *Schistosoma mansoni* SmKI-1 serine protease inhibitor binds to elastase and impairs  
592 neutrophil function and inflammation. PLoS pathogens. 2018;14(2):e1006870. Epub  
593 2018/02/10. doi: 10.1371/journal.ppat.1006870. PubMed PMID: 29425229; PubMed Central  
594 PMCID: PMC5823468.
- 595 20. Reimand J, Arak T, Adler P, Kolberg L, Reisberg S, Peterson H, et al. g:Profiler-a web  
596 server for functional interpretation of gene lists (2016 update). Nucleic Acids Res.

- 597 2016;44(W1):W83-9. Epub 2016/04/22. doi: 10.1093/nar/gkw199. PubMed PMID: 27098042;  
598 PubMed Central PMCID: PMCPMC4987867.
- 599 21. King RS, Newmark PA. In situ hybridization protocol for enhanced detection of gene  
600 expression in the planarian *Schmidtea mediterranea*. BMC developmental biology. 2013;13:8.  
601 doi: 10.1186/1471-213X-13-8. PubMed PMID: 23497040; PubMed Central PMCID:  
602 PMC3610298.
- 603 22. Mehlhorn H, Becker B, Andrews P, Thomas H, Frenkel JK. In vivo and in vitro  
604 experiments on the effects of praziquantel on *Schistosoma mansoni*. A light and electron  
605 microscopic study. *Arzneimittelforschung*. 1981;31(3a):544-54. PubMed PMID: 7195245.
- 606 23. Olliaro P, Delgado-Romero P, Keiser J. The little we know about the pharmacokinetics  
607 and pharmacodynamics of praziquantel (racemate and R-enantiomer). *J Antimicrob Chemother*.  
608 2014;69(4):863-70. doi: 10.1093/jac/dkt491. PubMed PMID: 24390933.
- 609 24. Sanchez MC, Krasnec KV, Parra AS, von Cabanlong C, Gobert GN, Umylny B, et al. Effect  
610 of praziquantel on the differential expression of mouse hepatic genes and parasite ATP binding  
611 cassette transporter gene family members during *Schistosoma mansoni* infection. *PLoS Negl  
612 Trop Dis*. 2017;11(6):e0005691. Epub 2017/06/27. doi: 10.1371/journal.pntd.0005691. PubMed  
613 PMID: 28650976; PubMed Central PMCID: PMCPMC5501684.
- 614 25. Fitzpatrick JM, Hirai Y, Hirai H, Hoffmann KF. Schistosome egg production is dependent  
615 upon the activities of two developmentally regulated tyrosinases. *FASEB J*. 2007;21(3):823-35.  
616 Epub 2006/12/15. doi: 10.1096/fj.06-7314com. PubMed PMID: 17167065.
- 617 26. Williams DL, Sayed AA, Bernier J, Birkeland SR, Cipriano MJ, Papa AR, et al. Profiling  
618 *Schistosoma mansoni* development using serial analysis of gene expression (SAGE). *Exp  
619 Parasitol*. 2007;117(3):246-58. Epub 2007/06/20. doi: 10.1016/j.exppara.2007.05.001. PubMed  
620 PMID: 17577588; PubMed Central PMCID: PMCPMC2121609.
- 621 27. Wilson RA, Li XH, MacDonald S, Neves LX, Vitoriano-Souza J, Leite LC, et al. The  
622 Schistosome Esophagus Is a 'Hotspot' for Microexon and Lysosomal Hydrolase Gene Expression:  
623 Implications for Blood Processing. *PLoS Negl Trop Dis*. 2015;9(12):e0004272. Epub 2015/12/08.  
624 doi: 10.1371/journal.pntd.0004272. PubMed PMID: 26642053; PubMed Central PMCID:  
625 PMCPMC4671649.
- 626 28. Chalmers IW, Fitzsimmons CM, Brown M, Pierrot C, Jones FM, Wawrzyniak JM, et al.  
627 Human IgG1 Responses to Surface Localised *Schistosoma mansoni* Ly6 Family Members Drop  
628 following Praziquantel Treatment. *PLoS Negl Trop Dis*. 2015;9(7):e0003920. Epub 2015/07/07.  
629 doi: 10.1371/journal.pntd.0003920. PubMed PMID: 26147973; PubMed Central PMCID:  
630 PMCPMC4492491.
- 631 29. Chalmers IW, McArdle AJ, Coulson RM, Wagner MA, Schmid R, Hirai H, et al.  
632 Developmentally regulated expression, alternative splicing and distinct sub-groupings in



- 633 members of the *Schistosoma mansoni* venom allergen-like (SmVAL) gene family. BMC  
634 genomics. 2008;9:89. Epub 2008/02/26. doi: 10.1186/1471-2164-9-89. PubMed PMID:  
635 18294395; PubMed Central PMCID: PMCPMC2270263.
- 636 30. Lin YL, He S. Sm22.6 antigen is an inhibitor to human thrombin. Mol Biochem Parasitol.  
637 2006;147(1):95-100. Epub 2006/02/28. doi: 10.1016/j.molbiopara.2006.01.012. PubMed PMID:  
638 16499980.
- 639 31. Fitzsimmons CM, Jones FM, Stearn A, Chalmers IW, Hoffmann KF, Wawrzyniak J, et al.  
640 The *Schistosoma mansoni* tegumental-allergen-like (TAL) protein family: influence of  
641 developmental expression on human IgE responses. PLoS Negl Trop Dis. 2012;6(4):e1593. Epub  
642 2012/04/18. doi: 10.1371/journal.pntd.0001593. PubMed PMID: 22509417; PubMed Central  
643 PMCID: PMCPMC3317908.
- 644 32. Xiao SH, Catto BA, Webster LT, Jr. Effects of praziquantel on different developmental  
645 stages of *Schistosoma mansoni* in vitro and in vivo. J Infect Dis. 1985;151(6):1130-7. Epub  
646 1985/06/01. doi: 10.1093/infdis/151.6.1130. PubMed PMID: 3998507.
- 647 33. Li XH, Stark M, Vance GM, Cao JP, Wilson RA. The anterior esophageal region of  
648 *Schistosoma japonicum* is a secretory organ. Parasit Vectors. 2014;7:565. Epub 2014/12/11.  
649 doi: 10.1186/s13071-014-0565-8. PubMed PMID: 25490864; PubMed Central PMCID:  
650 PMCPMC4269844.
- 651 34. Sabah AA, Fletcher C, Webbe G, Doenhoff MJ. *Schistosoma mansoni*: chemotherapy of  
652 infections of different ages. Exp Parasitol. 1986;61(3):294-303. PubMed PMID: 3086114.
- 653 35. Shaw MK. *Schistosoma mansoni*: stage-dependent damage after *in vivo* treatment with  
654 praziquantel. Parasitology. 1990;100 Pt 1:65-72. Epub 1990/02/01. PubMed PMID: 2107508.
- 655 36. Gryseels B, Mbaye A, De Vlas SJ, Stelma FF, Guisse F, Van Lieshout L, et al. Are poor  
656 responses to praziquantel for the treatment of *Schistosoma mansoni* infections in Senegal due  
657 to resistance? An overview of the evidence. Trop Med Int Health. 2001;6(11):864-73. Epub  
658 2001/11/13. PubMed PMID: 11703840.
- 659 37. Abla N, Keiser J, Vargas M, Reimers N, Haas H, Spangenberg T. Evaluation of the  
660 pharmacokinetic-pharmacodynamic relationship of praziquantel in the *Schistosoma mansoni*  
661 mouse model. PLoS Negl Trop Dis. 2017;11(9):e0005942. Epub 2017/09/22. doi:  
662 10.1371/journal.pntd.0005942. PubMed PMID: 28934207; PubMed Central PMCID:  
663 PMCPMC5626502.
- 664 38. Girgis NM, Gundra UM, Ward LN, Cabrera M, Frevert U, Loke P. Ly6C(high) monocytes  
665 become alternatively activated macrophages in schistosome granulomas with help from CD4+  
666 cells. PLoS pathogens. 2014;10(6):e1004080. Epub 2014/06/27. doi:  
667 10.1371/journal.ppat.1004080. PubMed PMID: 24967715; PubMed Central PMCID:  
668 PMCPMC4072804.

- 669 39. Doenhoff MJ, Sabah AA, Fletcher C, Webbe G, Bain J. Evidence for an immune-  
670 dependent action of praziquantel on *Schistosoma mansoni* in mice. *Trans R Soc Trop Med Hyg.*  
671 1987;81(6):947-51. Epub 1987/01/01. PubMed PMID: 3140436.
- 672 40. Wang B, Lee J, Li P, Saberi A, Yang H, Liu C, et al. Stem cell heterogeneity drives the  
673 parasitic life cycle of *Schistosoma mansoni*. *eLife.* 2018;7. Epub 2018/07/11. doi:  
674 10.7554/eLife.35449. PubMed PMID: 29988015; PubMed Central PMCID: PMC6039179.
- 675 41. Zamanian M, Fraser LM, Agbedanu PN, Harischandra H, Moorhead AR, Day TA, et al.  
676 Release of Small RNA-containing Exosome-like Vesicles from the Human Filarial Parasite *Brugia*  
677 *malayi*. *PLoS Negl Trop Dis.* 2015;9(9):e0004069. doi: 10.1371/journal.pntd.0004069. PubMed  
678 PMID: 26401956; PubMed Central PMCID: PMC4581865.
- 679 42. Samoil V, Dagenais M, Ganapathy V, Aldridge J, Glebov A, Jardim A, et al. Vesicle-based  
680 secretion in schistosomes: Analysis of protein and microRNA (miRNA) content of exosome-like  
681 vesicles derived from *Schistosoma mansoni*. *Sci Rep.* 2018;8(1):3286. Epub 2018/02/21. doi:  
682 10.1038/s41598-018-21587-4. PubMed PMID: 29459722; PubMed Central PMCID:  
683 PMC5818524.
- 684 43. Da'dara AA, de Laforcade AM, Skelly PJ. The impact of schistosomes and schistosomiasis  
685 on murine blood coagulation and fibrinolysis as determined by thromboelastography (TEG). *J*  
686 *Thromb Thrombolysis.* 2016;41(4):671-7. Epub 2015/11/18. doi: 10.1007/s11239-015-1298-z.  
687 PubMed PMID: 26573180; PubMed Central PMCID: PMC467217.
- 688 44. Gaertner F, Massberg S. Blood coagulation in immunothrombosis-At the frontline of  
689 intravascular immunity. *Semin Immunol.* 2016;28(6):561-9. Epub 2016/11/22. doi:  
690 10.1016/j.smim.2016.10.010. PubMed PMID: 27866916.
- 691 45. Skelly PJ. Intravascular schistosomes and complement. *Trends Parasitol.* 2004;20(8):370-  
692 4. Epub 2004/07/13. doi: 10.1016/j.pt.2004.05.007. PubMed PMID: 15246320.
- 693 46. Felizatti AP, Zeraik AE, Basso LGM, Kumagai PS, Lopes JLS, Wallace BA, et al. Interactions  
694 of amphipathic alpha-helical MEG proteins from *Schistosoma mansoni* with membranes.  
695 *Biochim Biophys Acta Biomembr.* 2019;183173. Epub 2019/12/31. doi:  
696 10.1016/j.bbamem.2019.183173. PubMed PMID: 31883997.
- 697 47. Orcia D, Zeraik AE, Lopes JLS, Macedo JNA, Santos CRD, Oliveira KC, et al. Interaction of  
698 an esophageal MEG protein from schistosomes with a human S100 protein involved in  
699 inflammatory response. *Biochim Biophys Acta Gen Subj.* 2017;1861(1 Pt A):3490-7. Epub  
700 2016/09/19. doi: 10.1016/j.bbagen.2016.09.015. PubMed PMID: 27639541.
- 701 48. Li XH, de Castro-Borges W, Parker-Manuel S, Vance GM, Demarco R, Neves LX, et al. The  
702 schistosome oesophageal gland: initiator of blood processing. *PLoS Negl Trop Dis.*  
703 2013;7(7):e2337. Epub 2013/08/13. doi: 10.1371/journal.pntd.0002337. PubMed PMID:  
704 23936568; PubMed Central PMCID: PMC3723592.

- 705 49. Neves LX, Wilson RA, Brownridge P, Harman VM, Holman SW, Beynon RJ, et al.  
706 Quantitative Proteomics of Enriched Esophageal and Gut Tissues from the Human Blood Fluke  
707 *Schistosoma mansoni* Pinpoints Secreted Proteins for Vaccine Development. *Journal of*  
708 *proteome research*. 2019. Epub 2019/11/16. doi: 10.1021/acs.jproteome.9b00531. PubMed  
709 PMID: 31729880.
- 710 50. Ranasinghe SL, Fischer K, Gobert GN, McManus DP. Functional expression of a novel  
711 Kunitz type protease inhibitor from the human blood fluke *Schistosoma mansoni*. *Parasit*  
712 *Vectors*. 2015;8:408. Epub 2015/08/05. doi: 10.1186/s13071-015-1022-z. PubMed PMID:  
713 26238343; PubMed Central PMCID: PMC4524284.
- 714 51. Koh CY, Kini RM. Anticoagulants from hematophagous animals. *Expert Rev Hematol*.  
715 2008;1(2):135-9. Epub 2008/12/01. doi: 10.1586/17474086.1.2.135. PubMed PMID: 21082917.
- 716 52. Ribeiro JM, Alarcon-Chaidez F, Francischetti IM, Mans BJ, Mather TN, Valenzuela JG, et  
717 al. An annotated catalog of salivary gland transcripts from *Ixodes scapularis* ticks. *Insect*  
718 *Biochem Mol Biol*. 2006;36(2):111-29. Epub 2006/01/25. doi: 10.1016/j.ibmb.2005.11.005.  
719 PubMed PMID: 16431279.
- 720 53. Tsujimoto H, Kotsyfakis M, Francischetti IM, Eum JH, Strand MR, Champagne DE.  
721 Simukunin from the salivary glands of the black fly *Simulium vittatum* inhibits enzymes that  
722 regulate clotting and inflammatory responses. *PLoS One*. 2012;7(2):e29964. Epub 2012/03/03.  
723 doi: 10.1371/journal.pone.0029964. PubMed PMID: 22383955; PubMed Central PMCID:  
724 PMC3285612.
- 725 54. Cwiklinski K, de la Torre-Escudero E, Trelis M, Bernal D, Dufresne PJ, Brennan GP, et al.  
726 The Extracellular Vesicles of the Helminth Pathogen, *Fasciola hepatica*: Biogenesis Pathways  
727 and Cargo Molecules Involved in Parasite Pathogenesis. *Molecular & cellular proteomics : MCP*.  
728 2015;14(12):3258-73. Epub 2015/10/22. doi: 10.1074/mcp.M115.053934. PubMed PMID:  
729 26486420; PubMed Central PMCID: PMC4762619.
- 730 55. Wang S, Wang S, Luo Y, Xiao L, Luo X, Gao S, et al. Comparative genomics reveals  
731 adaptive evolution of Asian tapeworm in switching to a new intermediate host. *Nature*  
732 *communications*. 2016;7:12845. Epub 2016/09/23. doi: 10.1038/ncomms12845. PubMed  
733 PMID: 27653464; PubMed Central PMCID: PMC5036155.
- 734 56. Flo M, Margenat M, Pellizza L, Grana M, Duran R, Baez A, et al. Functional diversity of  
735 secreted cestode Kunitz proteins: Inhibition of serine peptidases and blockade of cation  
736 channels. *PLoS pathogens*. 2017;13(2):e1006169. Epub 2017/02/14. doi:  
737 10.1371/journal.ppat.1006169. PubMed PMID: 28192542; PubMed Central PMCID:  
738 PMC5325619.
- 739 57. Falcon CR, Masih D, Gatti G, Sanchez MC, Motran CC, Cervi L. *Fasciola hepatica* Kunitz  
740 type molecule decreases dendritic cell activation and their ability to induce inflammatory  
741 responses. *PLoS One*. 2014;9(12):e114505. Epub 2014/12/09. doi:

- 742 10.1371/journal.pone.0114505. PubMed PMID: 25486609; PubMed Central PMCID:  
743 PMCPMC4259355.
- 744 58. Sanchez MC, Cupit PM, Bu L, Cunningham C. Transcriptomic analysis of reduced  
745 sensitivity to praziquantel in *Schistosoma mansoni*. *Mol Biochem Parasitol*. 2019;228:6-15.  
746 Epub 2019/01/19. doi: 10.1016/j.molbiopara.2018.12.005. PubMed PMID: 30658180; PubMed  
747 Central PMCID: PMCPMC6372308.
- 748 59. Ranasinghe SL, Duke M, Harvie M, McManus DP. Kunitz-type protease inhibitor as a  
749 vaccine candidate against schistosomiasis mansoni. *Int J Infect Dis*. 2018;66:26-32. Epub  
750 2017/11/13. doi: 10.1016/j.ijid.2017.10.024. PubMed PMID: 29128645.
- 751 60. Hernandez-Goenaga J, Lopez-Aban J, Protasio AV, Vicente Santiago B, Del Olmo E,  
752 Vanegas M, et al. Peptides Derived of Kunitz-Type Serine Protease Inhibitor as Potential Vaccine  
753 Against Experimental Schistosomiasis. *Front Immunol*. 2019;10:2498. Epub 2019/11/19. doi:  
754 10.3389/fimmu.2019.02498. PubMed PMID: 31736947; PubMed Central PMCID:  
755 PMCPMC6838133.
- 756 61. Hassan AS, Zelt NH, Perera DJ, Ndao M, Ward BJ. Vaccination against the digestive  
757 enzyme Cathepsin B using a YS1646 *Salmonella enterica* Typhimurium vector provides almost  
758 complete protection against *Schistosoma mansoni* challenge in a mouse model. *PLoS Negl Trop*  
759 *Dis*. 2019;13(12):e0007490. Epub 2019/12/04. doi: 10.1371/journal.pntd.0007490. PubMed  
760 PMID: 31790394.
- 761 62. Martins VP, Morais SB, Pinheiro CS, Assis NR, Figueiredo BC, Ricci ND, et al. Sm10.3, a  
762 member of the micro-exon gene 4 (MEG-4) family, induces erythrocyte agglutination in vitro  
763 and partially protects vaccinated mice against *Schistosoma mansoni* infection. *PLoS Negl Trop*  
764 *Dis*. 2014;8(3):e2750. Epub 2014/03/22. doi: 10.1371/journal.pntd.0002750. PubMed PMID:  
765 24651069; PubMed Central PMCID: PMCPMC3961193.
- 766 63. Tran MH, Pearson MS, Bethony JM, Smyth DJ, Jones MK, Duke M, et al. Tetraspanins on  
767 the surface of *Schistosoma mansoni* are protective antigens against schistosomiasis. *Nat Med*.  
768 2006;12(7):835-40. Epub 2006/06/20. doi: 10.1038/nm1430. PubMed PMID: 16783371.
- 769 64. Smithers SR, Terry RJ. Immunity in schistosomiasis. *Ann N Y Acad Sci*. 1969;160(2):826-  
770 40. Epub 1969/10/06. doi: 10.1111/j.1749-6632.1969.tb15904.x. PubMed PMID: 4981050.
- 771 65. Pearson MS, Becker L, Driguez P, Young ND, Gaze S, Mendes T, et al. Of monkeys and  
772 men: immunomic profiling of sera from humans and non-human primates resistant to  
773 schistosomiasis reveals novel potential vaccine candidates. *Front Immunol*. 2015;6:213. Epub  
774 2015/05/23. doi: 10.3389/fimmu.2015.00213. PubMed PMID: 25999951; PubMed Central  
775 PMCID: PMCPMC4419842.
- 776 66. Driguez P, Li Y, Gaze S, Pearson MS, Nakajima R, Trieu A, et al. Antibody Signatures  
777 Reflect Different Disease Pathologies in Patients With Schistosomiasis Due to *Schistosoma*

778 japonicum. J Infect Dis. 2016;213(1):122-30. Epub 2015/07/08. doi: 10.1093/infdis/jiv356.  
779 PubMed PMID: 26150545.

780 67. Gaze S, Driguez P, Pearson MS, Mendes T, Doolan DL, Trieu A, et al. An immunomics  
781 approach to schistosome antigen discovery: antibody signatures of naturally resistant and  
782 chronically infected individuals from endemic areas. PLoS pathogens. 2014;10(3):e1004033.  
783 Epub 2014/03/29. doi: 10.1371/journal.ppat.1004033. PubMed PMID: 24675823; PubMed  
784 Central PMCID: PMC3968167.

785



**A**

hepatic shift

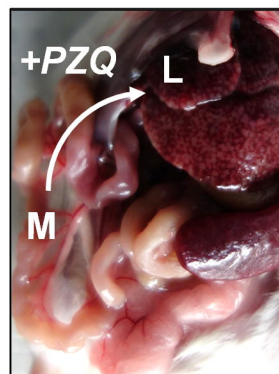**B**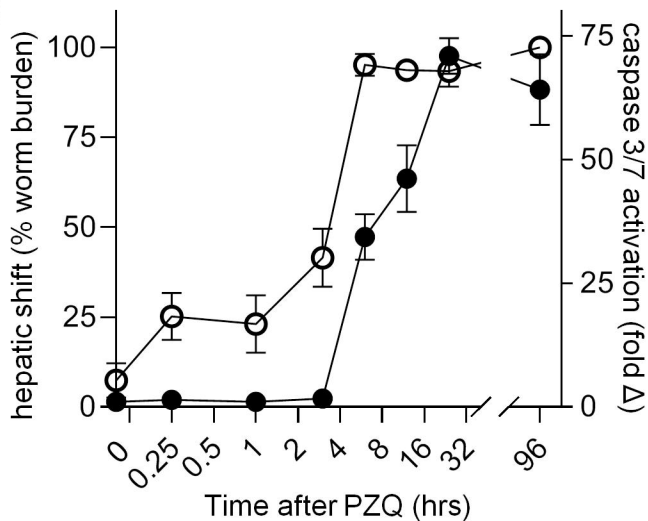**C**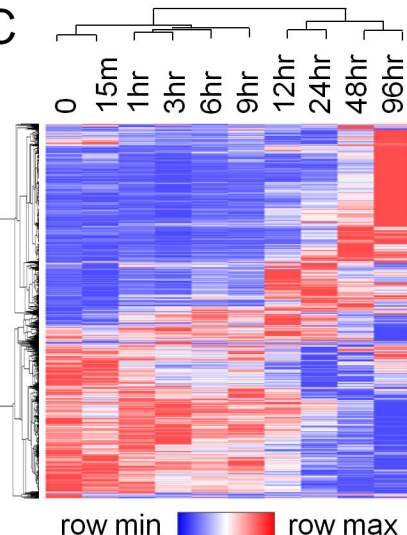**D**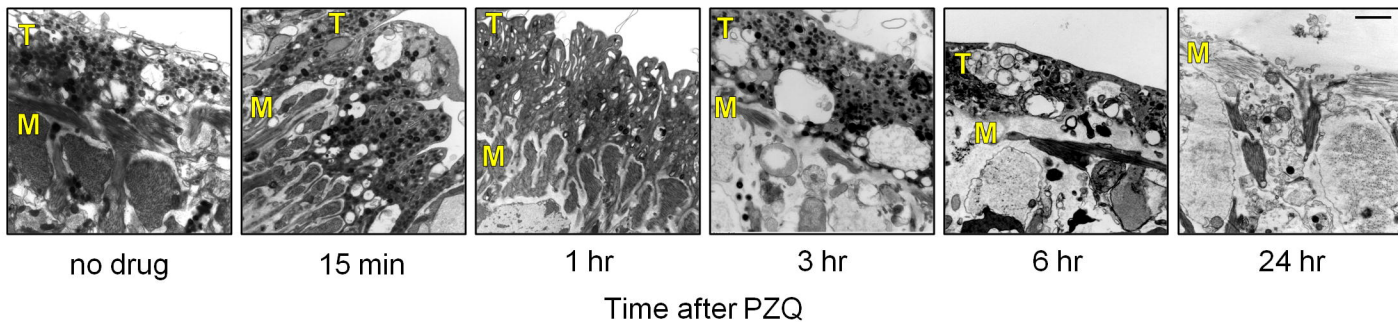

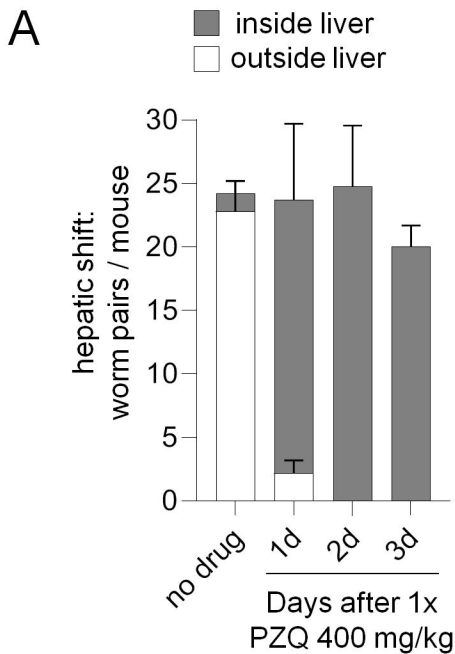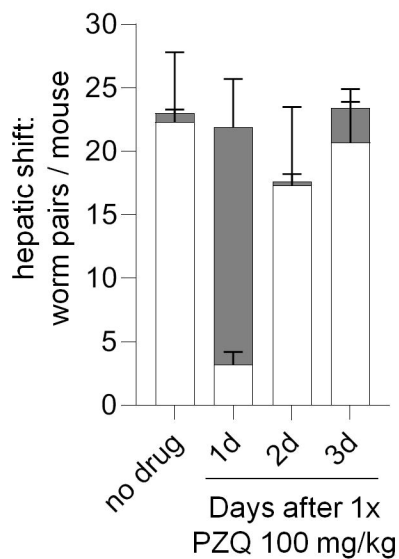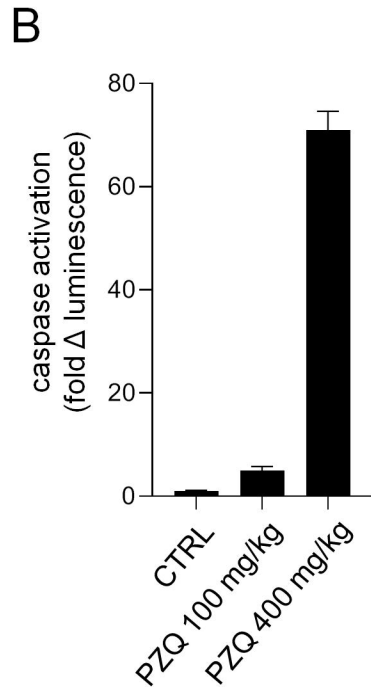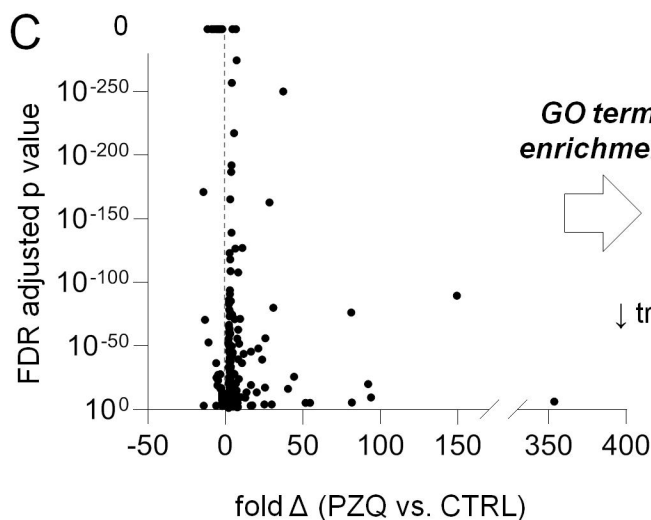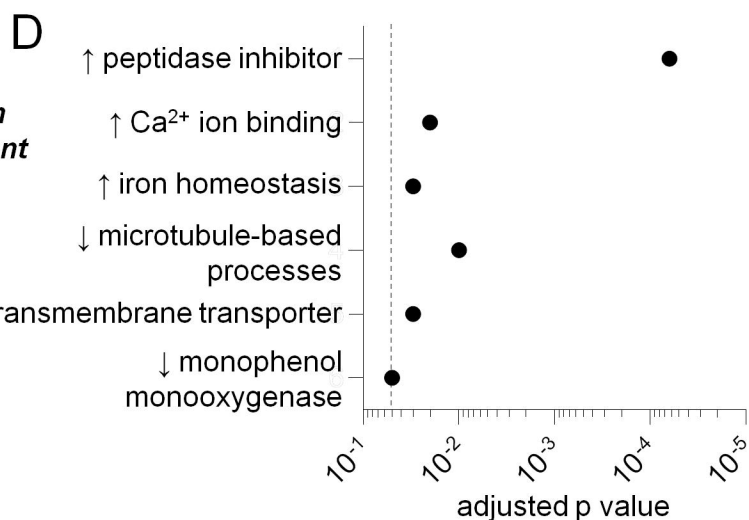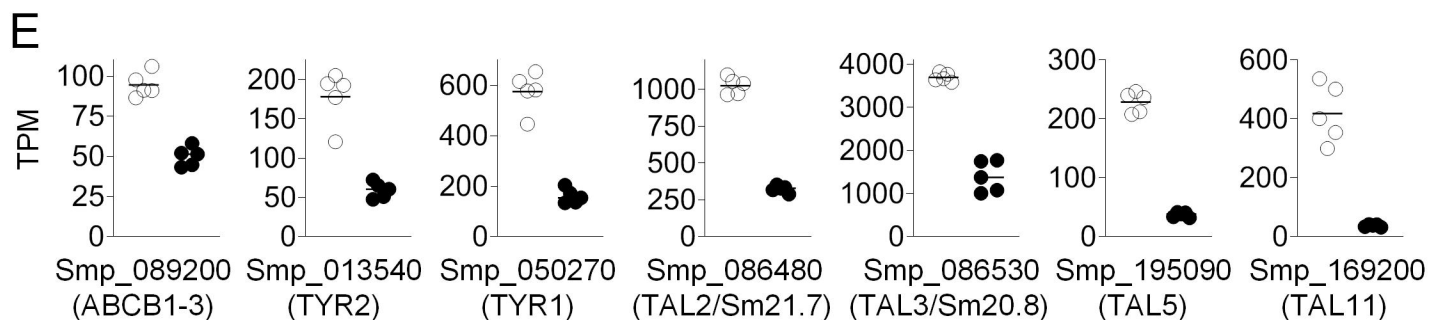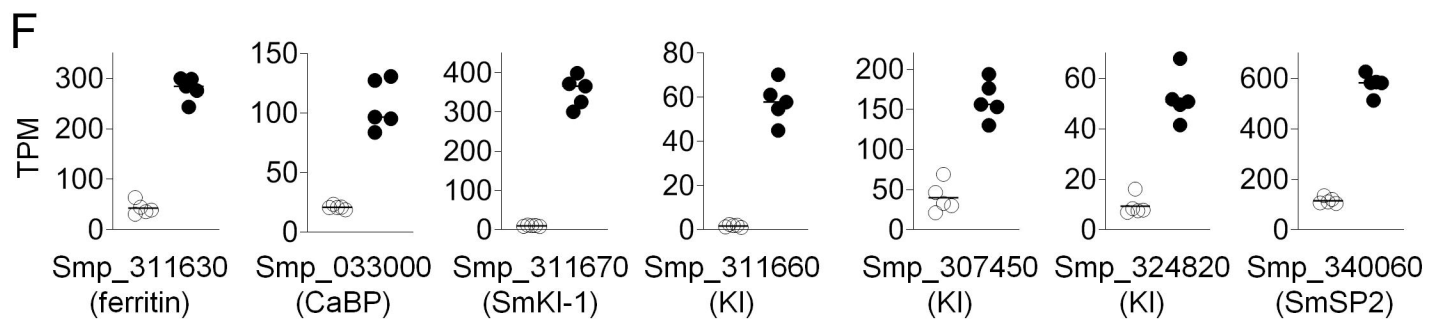



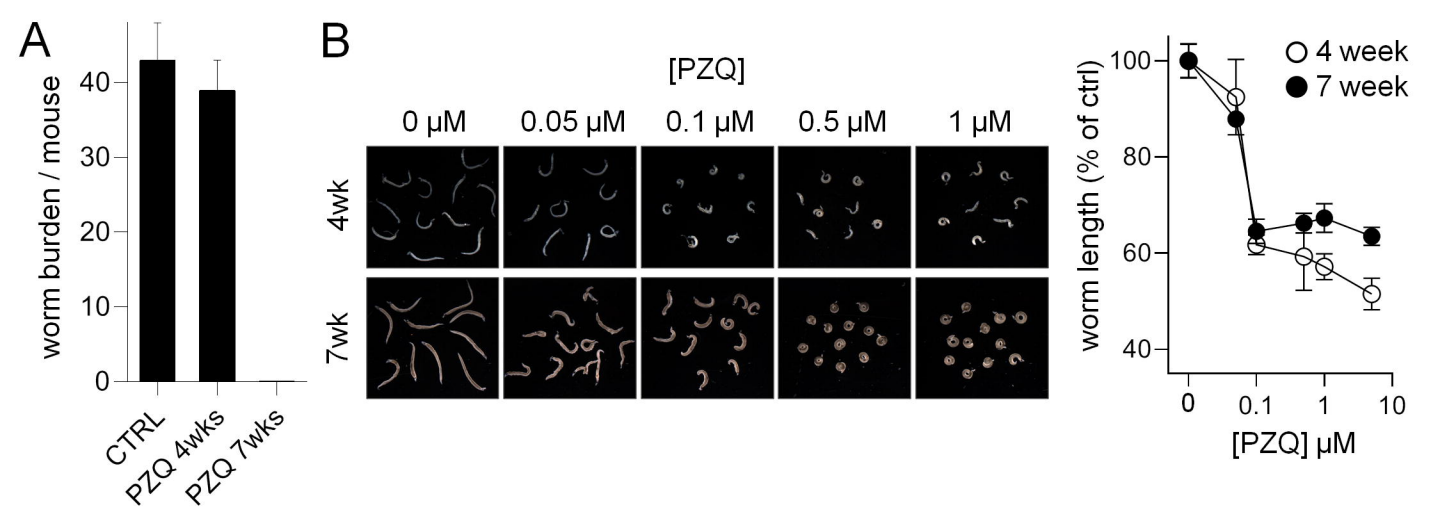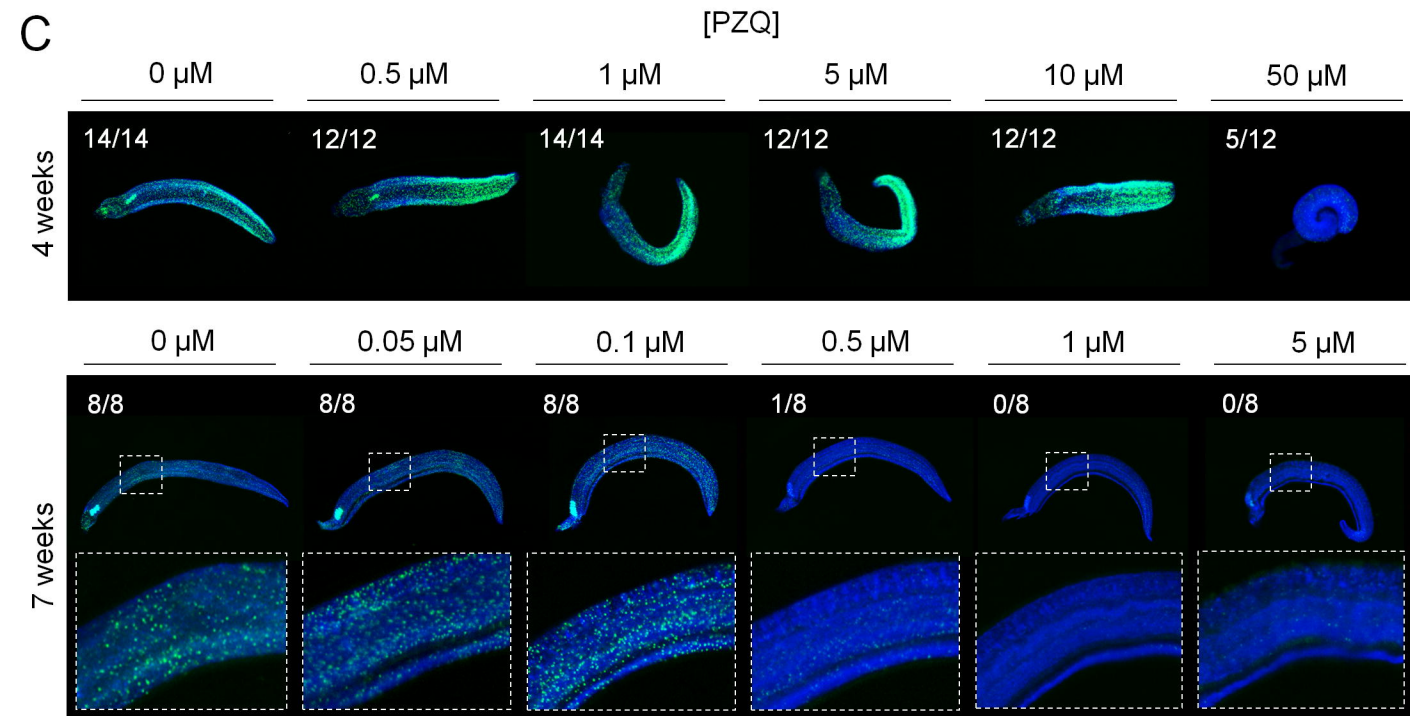

**D** PZQ down-regulated transcripts

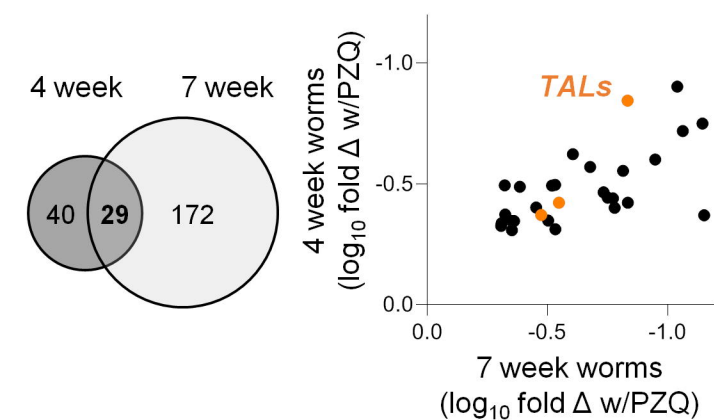

**E** PZQ up-regulated transcripts

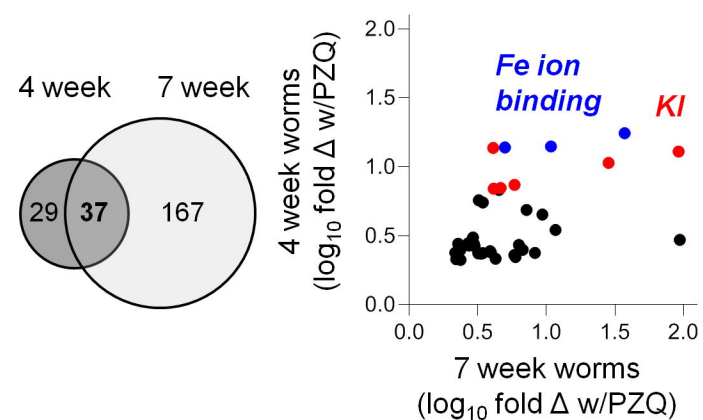

**A**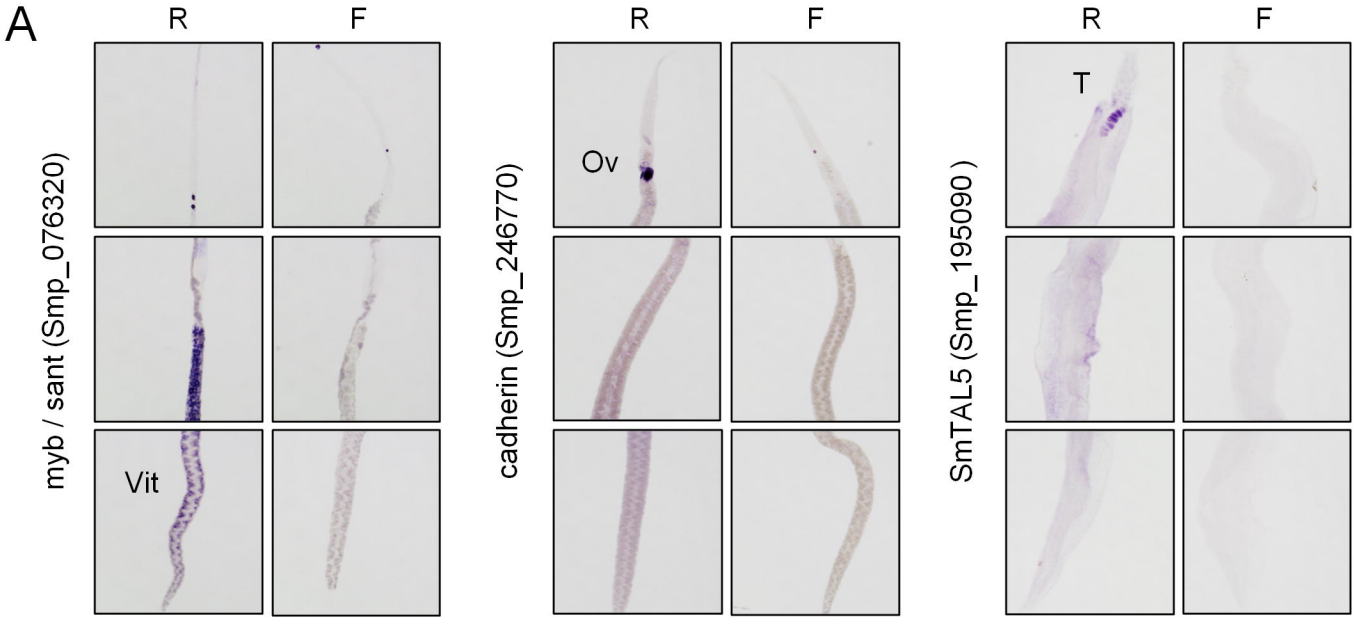**B**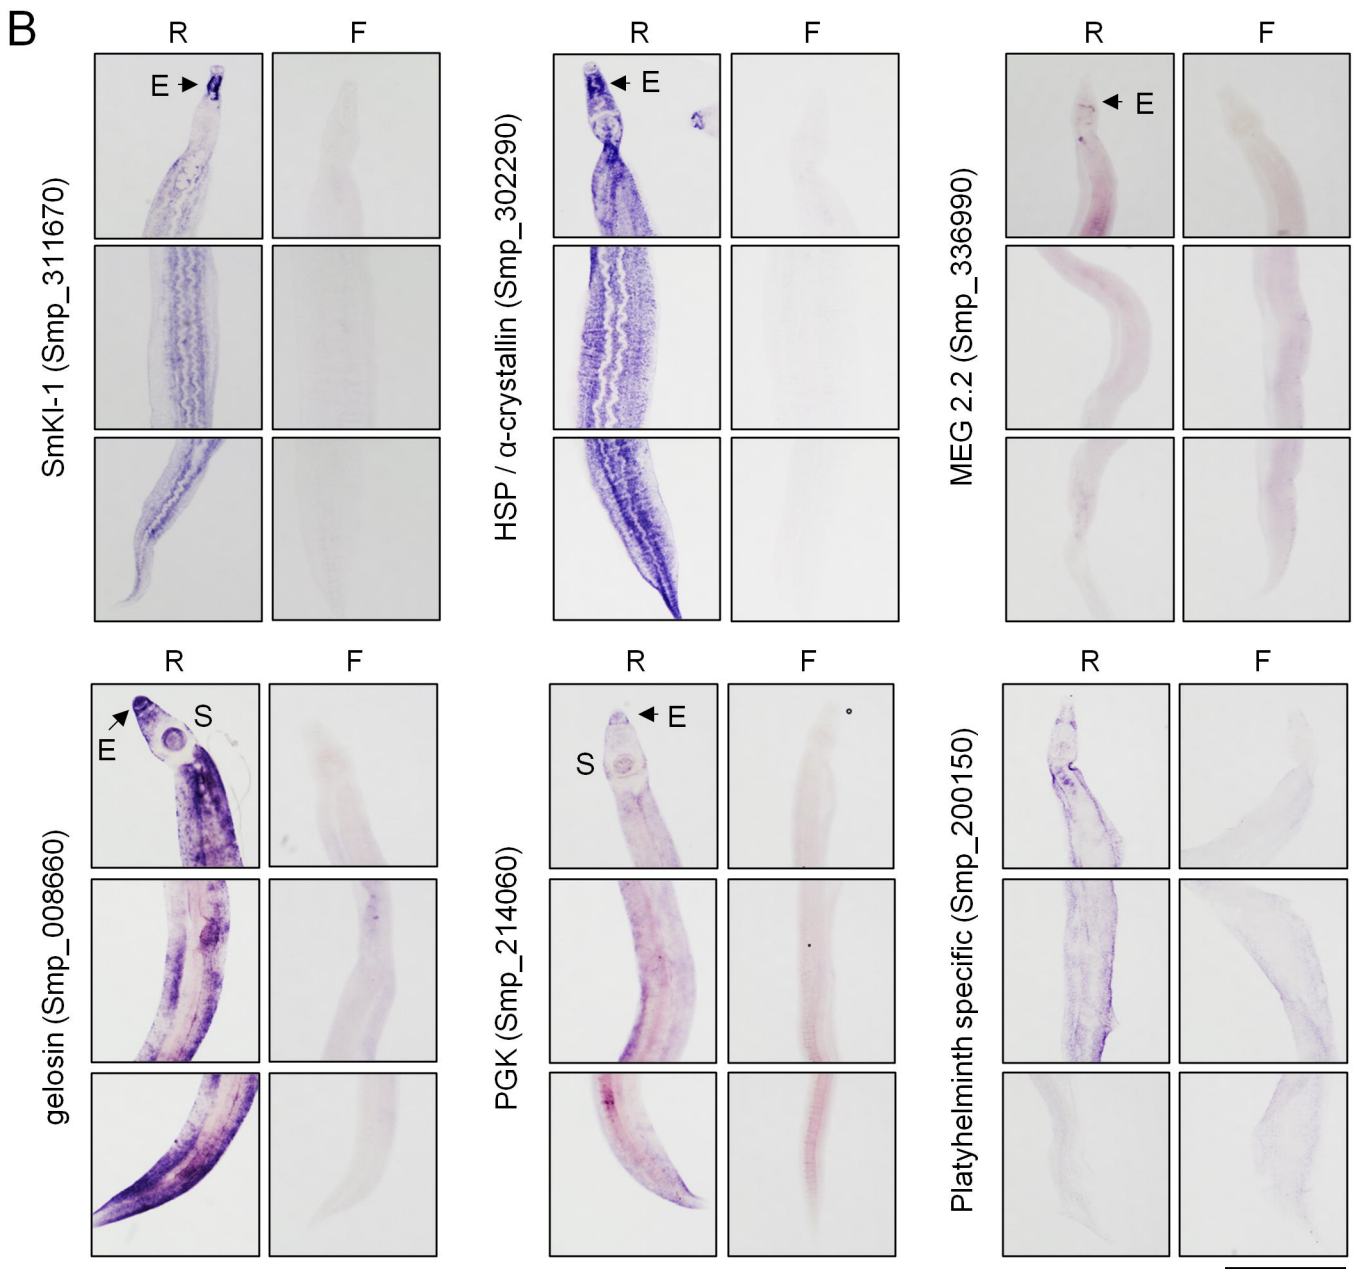

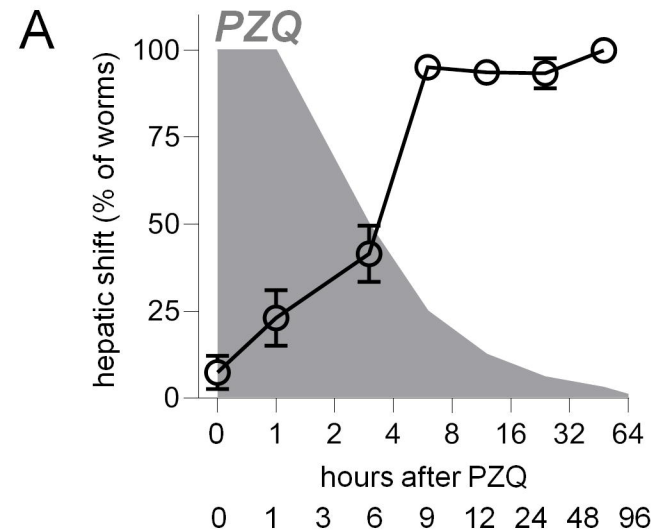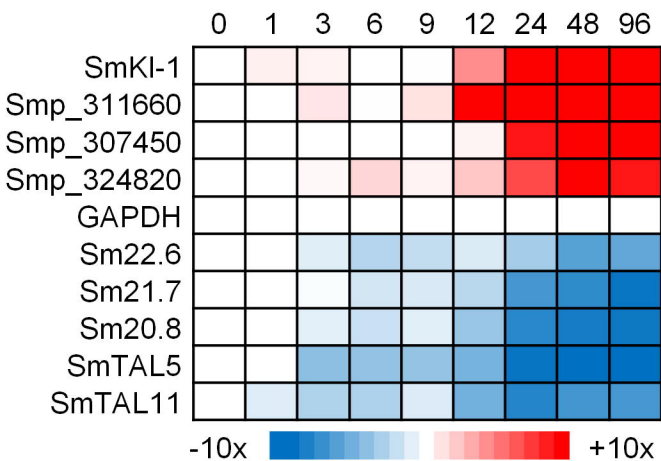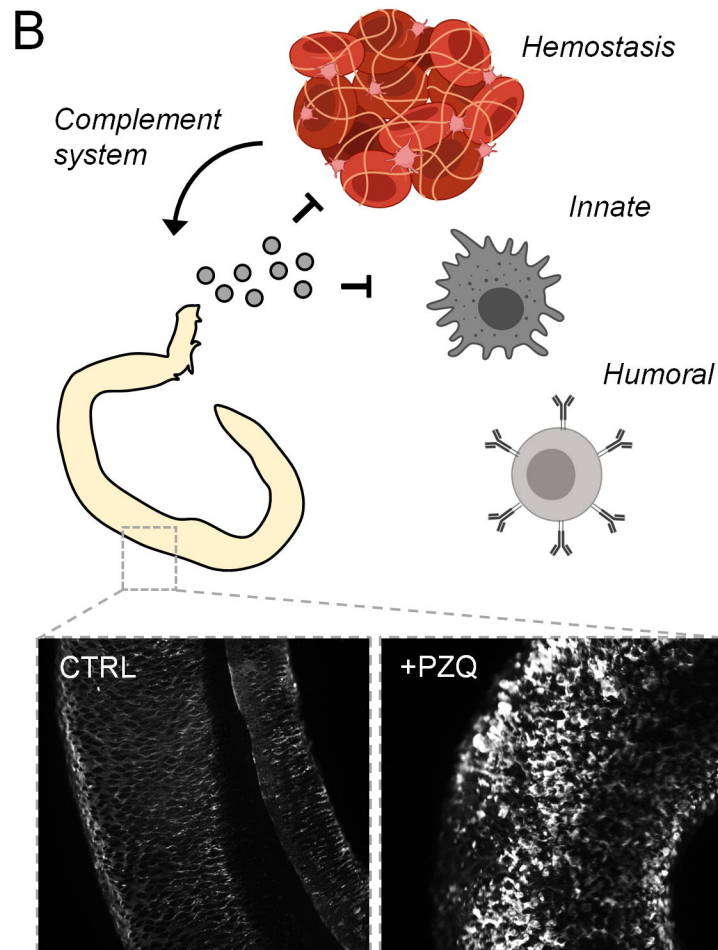

Source: https://www.biorxiv.org/content/10.1101/2020.01.22.915710v1.full.pdf
